# Supplementary material for: Behavioral Health Service Use by Military Children During Afghanistan and Iraq Wars
Source: Springer Nature journal article supplement (doi:10.1007/s11414-018-09646-0), 2019-01-09
Supplement: MOESM1 [file 16387816]

**Supplement 1**

**Behavioral Health Treatment for Military Children from 2000-2014**

**Behavioral health treatment**

A total of 5,004 behavioral health visits were received by child MHS beneficiaries from 2000-2014 in civilian acute care facilities. Table S1 reports behavioral health treatment characteristics by sex, race, visit type, bed-days, and unique number of child patients annually. Number of behavioral health visits (ranged from 180 to 316), patients (ranged from 132 to 217), and bed-days <7 days (ranged from 79 to 133) increased progressively from 2000 to 2004. Behavioral health visits and unique child patients peaked at 466 and 300, respectively, in 2013. Adolescents received the vast majority of behavioral health treatment (81.8%), which was almost evenly distributed between males (47.0%) and females (53%) with females having a considerably higher proportion of visits in 2000, 2012, and 2014. Whites received the majority of behavioral health visits (69.9%) followed by Blacks (23.1%). Behavioral health hospitalizations (53.7%) represented the largest proportion of behavioral health treatment compared to ED visits (43.6%).

**Mental health treatment**

A total of 4,638 mental health visits, representing 92.2% of all behavioral health visits, were received by 2,590 military children from 2000-2014. Table S2 reports mental health treatment characteristics by sex, race, visit type, bed-days, and unique number of child patients annually. Number of mental health visits (ranging from 171 to 316) increased progressively from 2000-2006 and unique child patients (ranging from 125 to 194) increased progressively from 2000-2003. Mental health hospitalizations lasting 8-14 days increased progressively from 2001-2006 (ranging from 20-60 hospitalizations). Adolescents received the vast majority of mental health treatment (80.4%), which was almost evenly distributed between males (45.9%) and females (54.1%) with females having a considerably higher proportion of visits in 2000, 2012, and 2014. Whites received the majority of mental health visits (69.6%) followed by Blacks (23.1%). Mental health hospitalizations (56.4%) represented the largest proportion of mental health treatment compared to ED visits (43.6%).

**Substance use treatment**

A total of 366 SUD visits were received by 220 military children from 2000-2014. Table S3 reports SUT characteristics by sex, race, visit type, bed-days, and unique number of patients annually. Number of SUD visits almost doubled from 2000-2001, remained relatively stable from 2001-2003, and peaked at 44 and 39 in 2004 and 2011, respectively. Unique child patients followed a similar trend, peaking at 41 and 31 in 2004 and 2011. An overwhelming majority of SUT occurred in the ED (79.0%); spiking to 34, 27, and 26 in 2004, 2011, and 2013, respectively. Annual mean SUD hospital bed-days varied over time with the longest average length of stay occurring in 2000 (44.3%), 2002 (46.7%), 2003 (33.0%), 2010 (28.7%), 2011 (47.8%), and 2014 (28.0%). Adolescents almost exclusively (97.3%) accounted for SUT over the 15-year study period. Boys received almost two-thirds of SUD visits, but girls received a higher proportion of SUD visits in 2009. White children received a slightly higher proportion of SUD visits (74.9%), whereas Blacks, other racial minorities, and Hispanics received 21.0%, 1.1%, and 3.0% of SUD visits, respectively.
